# Supplementary material for: Independent component analysis recovers consistent regulatory signals from disparate datasets
Source: PLoS Comput Biol. 2021 Feb 2;17(2):e1008647. doi: 10.1371/journal.pcbi.1008647 (PMC7888660; doi:10.1371/journal.pcbi.1008647)
Supplement: S1 Table — (XLSX) [file pcbi.1008647.s009.xlsx]

## Sheet: Sheet1
iModulon	Description	Linear Regression Coefficient
RNAseq-1_46	CysB	0.44
RNAseq-1_54	Thiamine Riboswitch	0.29
RNAseq-1_17	ArgR	0.2
RNAseq-1_87	leu-tRNA-mediated attenuation	0.19
RNAseq-1_77	TyrR	0.15
RNAseq-1_73	MetJ	0.15
RNAseq-1_58	GlpR	0.11
RNAseq-1_3	Cellular response to nutrient levels	-0.11
RNAseq-1_78	Uncharacterized	-0.14
RNAseq-1_24	Lrp	-0.2
